# Supplementary material for: Co nanoparticles combined with nitrogen-doped graphitic carbon anchored on carbon fibers as a self-standing air electrode for flexible zinc–air batteries
Source: Royal Society of Chemistry journal article supplement (doi:10.1039/d0ta00793e), 2020-01-01
Supplement: d0ta00793e1.pdf [file d0ta00793e1.pdf]

## Supporting Information

### Co Nanoparticles Combined with Nitrogen-Doped Graphitic Carbon Anchored in Carbon Fibers as a Self-standing Air Electrode for Flexible Zinc-Air Batteries

Yangshen Chen<sup>a</sup>, Wenhui Zhang<sup>a</sup>, Zeyu Zhu<sup>a</sup>, Lulu Zhang<sup>a</sup>, Jiayi Yang<sup>a</sup>, Huanhuan Chen<sup>a</sup>, Bing Zheng<sup>a</sup>, Sheng Li<sup>a</sup>, Weina Zhang<sup>a</sup>, Jiansheng Wu<sup>\*a</sup>, Fengwei Huo<sup>\*a</sup>

a. Key Laboratory of Flexible Electronics (KLOFE) & Institute of Advanced Materials (IAM), Nanjing Tech University (NanjingTech), 30 South Puzhu Road, Nanjing 211816, China

Emails: iamjswu@njtech.edu.cn, iamfwhuo@njtech.edu.cn

The potentials (vs. Ag/AgCl) in this work were converted to RHE by using the Nernst equation<sup>1</sup>:

$$(E_{\text{RHE}} = E_{\text{Ag/AgCl}} + 0.197 + 0.059 \text{ pH})$$

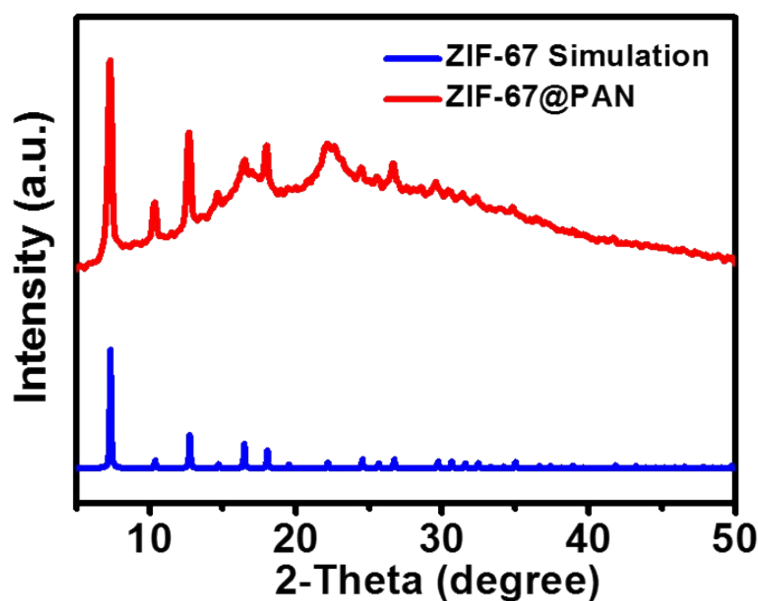

Fig. S1. The XRD pattern of ZIF-67@PAN and ZIF-67 simulation.

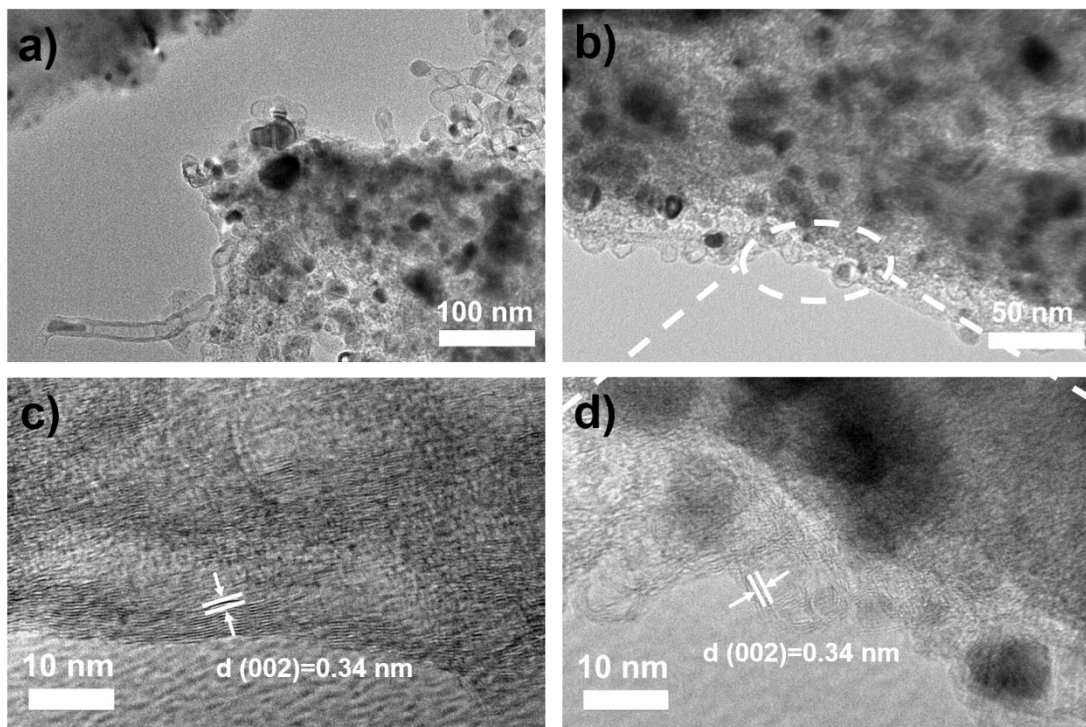

Fig. S2. (a-b) TEM images and (c-d) HRTEM images of Co@NPCFs

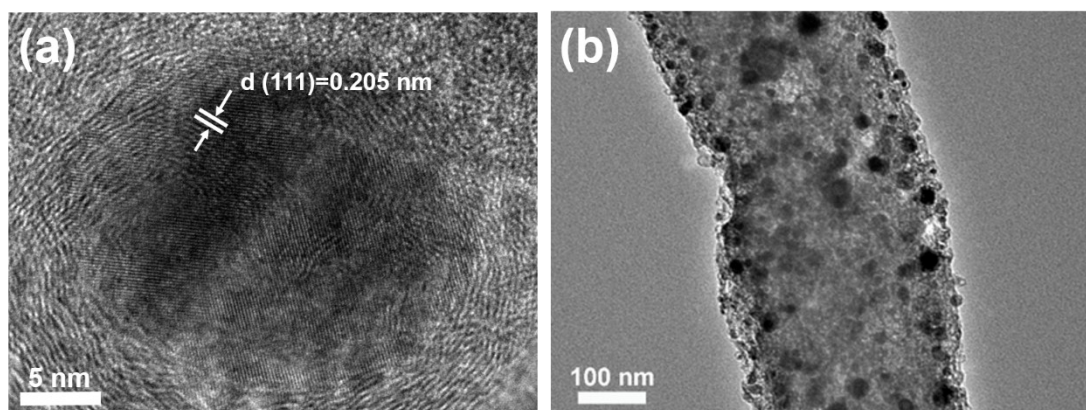

Fig. S3. (a) HRTEM images of Co@NPCFs and (b) TEM image of Co@NCFs.

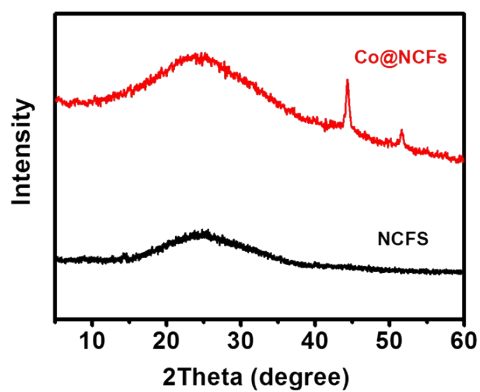

Fig. S4. XRD patterns of NCFs and Co@NCFs.

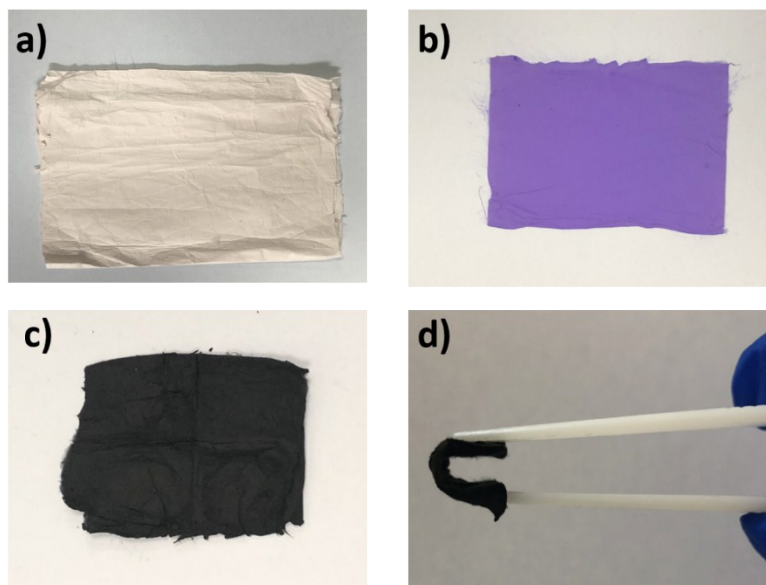

Fig. S5. The photographs of (a)  $\text{Co}(\text{AC})_2/\text{PAN}$  (b)  $\text{ZIF-67@PAN}$  (c-d)  $\text{Co@NPCFs}$ .

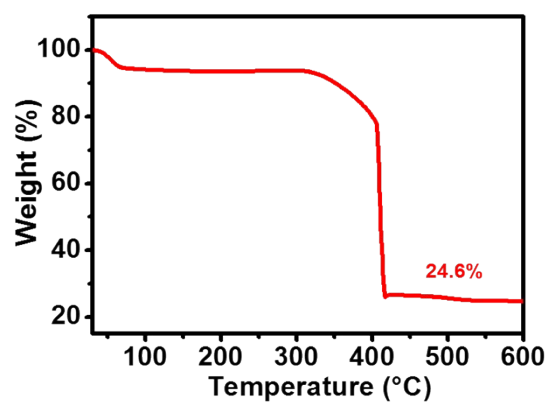

Fig. S6. TGA data of the  $\text{Co@NPCFs}$ .

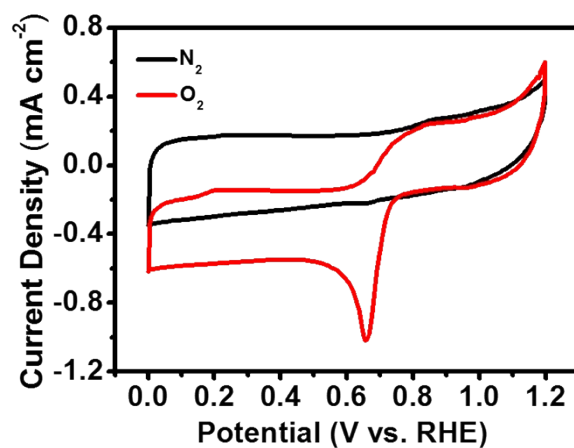

Fig. S7. CV curves of  $\text{Co@NPCFs}$  in  $\text{O}_2$ - and  $\text{N}_2$ - saturated 0.1 M KOH solution.

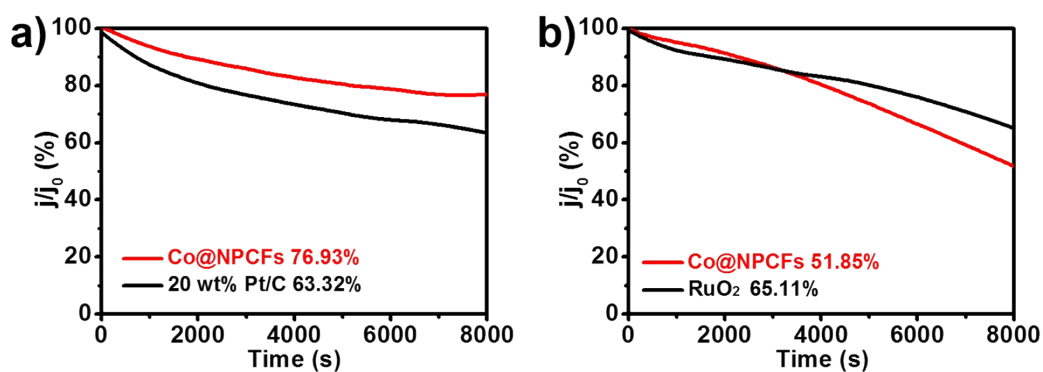

Fig. S8. (a) ORR and (b) OER chronoamperometric responses of Co@NPCFs at a constant potential of 0.7 V and 1.6 V, respectively.

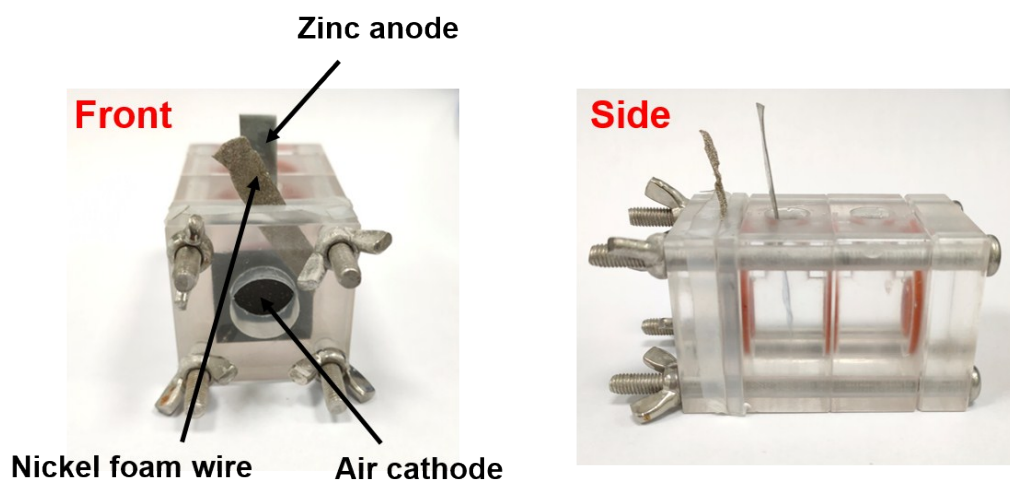

Fig. S9. The photographs of liquid-state ZABs mould.

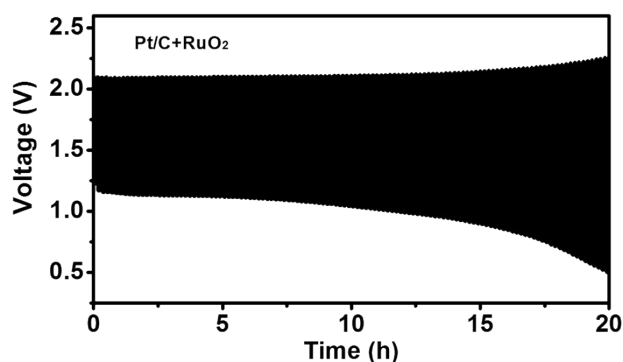

Fig. S10. Galvanostatic cycling stability of the liquid-state ZAB based upon Pt/C+RuO<sub>2</sub> at 5 mA cm<sup>-2</sup>.

Table 1

| Catalyst | $\Delta E$ (V) | Power density (mW cm <sup>-2</sup> ) | Discharge stability (liquid state) | Discharge stability (solid state) | Ref |
|----------|----------------|--------------------------------------|------------------------------------|-----------------------------------|-----|
|          |                |                                      |                                    |                                   |     |

|                                                        |             |              |                                           |                                           |                     |
|--------------------------------------------------------|-------------|--------------|-------------------------------------------|-------------------------------------------|---------------------|
| <b>Co@NPCFs</b>                                        | <b>0.97</b> | <b>91.87</b> | <b>80 h at 5 mA cm<sup>-2</sup></b>       | <b>5 h at 3 mA cm<sup>-2</sup></b>        | <b>Present work</b> |
| <b>NCNF-1000</b>                                       | <b>1.02</b> | <b>185</b>   | <b>83 h at 10 mA cm<sup>-2</sup></b>      | <b>6 h at 2 mA cm<sup>-2</sup></b>        | <b>[2]</b>          |
| <b>Co<sub>3</sub>FeS<sub>1.5</sub>(OH)<sub>6</sub></b> | <b>0.87</b> | <b>113.1</b> | <b>36 h at 2 mA cm<sup>-2</sup></b>       | <b>-</b>                                  | <b>[3]</b>          |
| <b>Co<sub>3</sub>O<sub>4</sub>/N-rGO nanosheets</b>    | <b>0.93</b> | <b>-</b>     | <b>-</b>                                  | <b>25 h at 3 mA cm<sup>-2</sup></b>       | <b>[4]</b>          |
| <b>DN-CP@G</b>                                         | <b>0.99</b> | <b>135</b>   | <b>250 cycles at 5 mA cm<sup>-2</sup></b> | <b>180 cycles at 1 mA cm<sup>-2</sup></b> | <b>[5]</b>          |
| <b>Ni<sub>3</sub>Fe/N-C sheets</b>                     | <b>0.84</b> | <b>-</b>     | <b>420 h at 10 mA cm<sup>-2</sup></b>     | <b>-</b>                                  | <b>[6]</b>          |
| <b>PCN-CFP</b>                                         | <b>0.96</b> | <b>-</b>     | <b>50 h at 20 mA cm<sup>-2</sup></b>      | <b>-</b>                                  | <b>[7]</b>          |
| <b>Fe-N<sub>x</sub>-C</b>                              | <b>0.92</b> | <b>96.4</b>  | <b>300 h at 5 mA cm<sup>-2</sup></b>      | <b>120 h at 1 mA cm<sup>-2</sup></b>      | <b>[8]</b>          |

## Reference

1. B. Chen, X. He, F. Yin, H. Wang, D.-J. Liu, R. Shi, J. Chen and H. Yin, *Adv. Funct. Mater.*, 2017, **27**, 1700795.
2. Q. Liu, Y. Wang, L. Dai and J. Yao, *Adv Mater*, 2016, **28**, 3000-3006.
3. H. F. Wang, C. Tang, B. Wang, B. Q. Li and Q. Zhang, *Adv Mater*, 2017, **29**, 1702327.
4. Y. Li, C. Zhong, J. Liu, X. Zeng, S. Qu, X. Han, Y. Deng, W. Hu and J. Lu, *Adv. Mater.*, 2018, **30**, 1703657.
5. C. Hang, J. Zhang, J. Zhu, W. Li, Z. Kou and Y. Huang, *Adv. Energy Mater.*, 2018, **8**, 1703539.
6. G. Fu, Z. Cui, Y. Chen, Y. Li, Y. Tang and J. B. Goodenough, *Adv. Energy Mater.*, 2017, **7**, 1601172.
7. T. Y. Ma, J. Ran, S. Dai, M. Jaroniec and S. Z. Qiao, *Angew. Chem. Int. Ed.*, 2015, **54**, 4646-4650.
8. J. Han, X. Meng, L. Lu, J. Bian, Z. Li and C. Sun, *Adv. Funct. Mater.*, 2019, 1808872.
